# Supplementary material for: Immune Evasion and Recognition of the Syphilis Spirochete in Blood and Skin of Secondary Syphilis Patients: Two Immunologically Distinct Compartments
Source: PLoS Negl Trop Dis. 2012 Jul 17;6(7):e1717. doi: 10.1371/journal.pntd.0001717 (PMC3398964; doi:10.1371/journal.pntd.0001717)
Supplement: Table S1 — Tp loads and IHC quantitation results. (XLSX) [file pntd.0001717.s001.xlsx]

## Sheet: Table S1
	Supplemental Table 1. Comparative Immunohistochemical Analysis of Secondary Syphilis Biopsies
	ID	Punch biopsy site	Tp polA copies/µg total DNA	CD68	CD14	CD11c	CD4	CD8	CD56
	72	Posterior lumbar	1110	++	+++	++	+	++	+
	73	Right iliac crest	773	++	+++	+	+	++	+
	76	Posterior neck	628	++	+++	++	+	++	+
	77	Right ankle	1770000	++	++++	++	++	++	+
	* For each marker 1+ = 0-25%, 2+ 25-50%, 3+ 50-75%, 4+ > 75% of total cells stained

## Sheet: Table S2
	Supplemental Table 2
	HUMAN IMMUNE ARRAY
	Gene	Name	Fold increase	p value
	PATHOGEN RECOGNITION
	Phagocytes and Antigen Presenting Cells
	HLA-DRA	MHC II	8.2524	7.0E-4
	HLA-DRB1	MHC II	919.763	0.102
	CD40	CD40	2.4431	0.0167
	CD80	B7-1	128.978	0.0104
	CD86	B7-2	6.3619	0.0177
	Other
	FAS	CD95	3.1543	0.0225
	CD34	Hematopoietic progenitor cell antigen CD34	1	0.6056
	TNFRSF18	Tumor Necrosis Factor Receptor	2.5476	0.0787
	Scavenger Receptors
	CD68	Scavenger Receptor Class D	11.9328	1.0E-4
	SIGNALING AND TRANSCRIPTION
	Nuclear transcription factor
	NFKB2	Nuclear Factor Kappa Beta	2.4004	0.0126
	TBX21	T-box transcription factor	64.7895	0.0194
	PTPRC	CD45, Protein Tyrosine Phosphatase Receptor C	15.4684	7.0E-4
	Integrin ligands
	ICAM1	CD54	7.5391	9.0E-4
	SELE	CD62E, E-Selectin, ELAM	2.9736	0.0717
	SELP	CD62P, P-Selectin	1.7067	0.2683
	CYTOKINES
	Proinflammatory cytokines
	TNF	Tumor Necrosis Factor	9.2554	0.0029
	IL6	Interleukin 6	9.1039	0.0024
	IL1B	Interleukin 1 β	16.7885	0.0084
	IFNG	Interferon γ	5.9029	0.0121
	LTA	Lymphotoxin α	7.203	0.0369
	IL17	Interleukin 17	2.1516	0.0618
	IL12A	Interleukin 12 α	4.9088	0.4052
	IL12B	Interleukin 12 β	7.3072	0.2363
	IL18	Interleukin 18	0	0.1292
	IL1A	Interleukin 1 α	2.8429	0.2285
	IL-15	Interleukin 15	12.7129	0.0428
	Th-2 type cytokines
	IL10	Interleukin 10	27.1402	0.0010
	IL4	Interleukin 4	35.3665	0.1579
	IL5	Interleukin 5	1.7207	0.1534
	IL13	Interleukin 13	5.5975	0.2467
	IL7	Interleukin 7	1.3527	0.6733
	IL9	Interleukin 9	1	0.7668
	Growth and stimulation factors
	TGFB1	Transforming Growth Factor	3.3606	4.0E-4
	CSF1	M-CSF	2.3191	0.0821
	CSF2	GM-CSF	7.195	0.0705
	CSF3	G-CSF	0	0.5546
	VEGF	Vascular endothelial growth factor	1.169	0.4721
	IL2	Interleukin 2	2.2354	0.1463
	IL3	Interleukin 3	2.0959	0.0815
	IL2RA	Interleukin 2 receptor alpha	8.4288	0.0107
	Chemokines
	IL8	Interleukin 8	84.4357	0.054
	CC chemokines
	CCL2	MCP-1	7	5.0E-4
	CCL3	MIP-1a	115.459	0.0184
	CCL5	RANTES	63.1386	1.0E-4
	CCL19	ELC	7.5261	0.0114
	CXC chemokines
	CXCL10	IP-10, CRG-2	386.96	3.0E-4
	CXCL11	I-TAC, IP-9	226.489	0.0024
	Chemokine receptors
	CCR2	Chemokine (C-C motif) receptor 2	3.6019	0.115
	CCR4	Chemokine (C-C motif) receptor 4	2.8926	0.0345
	CCR5	Chemokine (C-C motif) receptor 5	9.703	0.0014
	CCR7	Chemokine (C-C motif) receptor 7	18.1903	0.0057
	CXCR3	Chemokine (C-X-C motif) receptor 3	39.4213	0.1378
	CELLULAR CYTOTOXYCITY
	GNLY	Granulysin	85.1659	3.0E-4
	GZMB	Granzyme B	78.2302	8.0E-4
	PRF1	Perforin	17.5552	0.0060
	SURFACE MOLECULES
	Lymphocytes
	CD3E	T-cell surface glycoprotein CD3 epsilon chain	13.0403	0.0037
	CD8A	T-cell surface glycoprotein CD8 alpha chain	177.166	6.0E-4
	CD4	T-cell surface glycoprotein CD4	6.6494	0.0066
	CD19	B-lymphocyte antigen CD19	27.1325	0.0182
	CD28	T-cell-specific surface glycoprotein CD28	9.3233	0.0044
	ICOS	CD 278, Inducible T Cell Co-stimulator	8.4717	0.1458
	CD38	Cyclic ADP-ribose hydrolase	52.4039	0.0066
	CD40LG	CD 154	19.4379	0.0070
	CTLA4	CD 152	29.1352	0.0107
	FASLG	CD178	23.6945	0.0227
	APOPTOSIS
	BAX	Apoptosis regulator	1.8554	0.1744
	BCL2	Apoptosis regulator Bcl-2	1	0.716
	BCL2L1	Apoptosis regulator Bcl-X	2.9555	0.2019
	MISCELANEOUS
	C3	Complement component C3	2.7878	0.0643
	NOS2A	Nitric Oxide Synthase 2 (Inducible)	1.4643	0.3218
	CYP1A2	Cytochrome P450	2.0959	0.0815
	CYP7A1	Cholesterol 7-alpha-hydroxylase	0.698	0.6967
	COL4A5	Collagen, type IV	0.7473	0.6518
	HMOX1	Heme oxygenase (decycling) 1	2.6178	0.0054
	RPL3L	60S ribosomal protein L3-like	2.8961	0.0482
	AGTR1	Angiotensin II receptor, type 1	0.8516	0.8202
	AGTR2	Angiotensin II receptor, type 2	2.0959	0.0815
	ECE1	Endothelin converting enzyme 1	1.1282	0.6884
	EDN1	Endothelin 1	1.615	0.1273
	LRP2	Low density lipoprotein receptor-related protein 2	2.1503	0.0622
	MYH6	Myosin heavy chain 6	2.1483	0.0628
	PGK1	Phosphoglycerate kinase 1	1.2991	0.2513
	PTGS2	Prostaglandin H2 synthase 2	1.1464	0.7268
	REN	Renin	14.1101	0.286
	SKI	Proto-oncogene c-Ski	0.7099	0.3644
	SMAD3	SMAD family member 3	0.9608	0.9209
	SMAD7	SMAD family member 7	1.6492	0.1424
	TFRC	Transferrin receptor protein 1	1.3183	0.4936

## Sheet: Table S3
	Supplemental Table 3
	HUMAN PHAGOCYTOSIS ARRAY
	Gene	Name	Fold increase	p value
	PATHOGEN RECOGNITION
	Fc Receptors
	FcGR1A / FcGR1C	CD64	83.8568	0.0024
	FcGR2A	CD32	6.9998	0.0
	FcGR3A / FcGR3B	CD16	20.7651	0.0
	FcER1A	IgE Fc receptor subunit alpha	0.6993	0.617
	FcER1G	IgE Fc receptor subunit gamma	7.9399	0.0
	FcER2	CD23	1.4642	0.4417
	TLRs
	TLR1	Toll-Like-Receptor 1	6.3751	0.001
	TLR2	Toll-Like-Receptor 2	2.4228	0.012
	TLR3	Toll-Like-Receptor 3	1.3904	0.328
	TLR4	Toll-Like-Receptor 4	6.4419	0.002
	TLR5	Toll-Like-Receptor 5	0.9736	0.927
	TLR6	Toll-Like-Receptor 6	3.1624	0.071
	TLR7	Toll-Like-Receptor 7	18.6452	2.0E-4
	TLR8	Toll-Like-Receptor 8	21.7813	0.0
	TLR9	Toll-Like-Receptor 9	18.6394	3.0E-4
	TLR10	Toll-Like-Receptor 10	13.5038	0.0357
	Scavenger Receptors
	MSR1	Macrophage scavenger receptor 1	4.9475	4.0E-4
	MARCO	Macrophage Marco Receptor	3.9517	0.0812
	Lectin-type receptors
	CLEC7A	Dendritic cell-associated C-type lectin 1	9.2464	0.0010
	Complement receptors
	CR1	CD35	10.9989	0.0062
	Macrophage-Mannose Receptor
	MRC2	Macrophage mannose receptor 2	0.6709	0.4729
	Integrins
	ITGA1	CD49a / VLA1	1.9272	0.0616
	ITGA2	CD49b / VLA2	0.7479	0.1963
	ITGA3	CD49c / VLA3	0.8383	0.6536
	ITGA4	CD49d / VLA4	7.5402	2.0E-4
	ITGA5	CD49e / VLA5	1.6009	0.12
	ITGA6	CD49f / VLA6	1.0111	0.9682
	ITGA7	FLJ25220	0.6986	0.5701
	ITGA9	RLC	1.3586	0.2632
	ITGA2B	Platelet membrane glycoprotein Iib	0.8553	0.6745
	ITGAE	CD103 / HUMINAE	1.3446	0.1974
	ITGAL	CD11a / LFA1A	10.2707	2.0E-4
	ITGAM	CD11b / MAC-1 / CR3A	2.1417	0.0838
	ITGAV	CD51 / VNRA, MSK8	0.9001	0.7848
	ITGAX	CD11c / CR4	14.9735	6.0E-4
	ITGB1	CD29/ FNRB, MSK12, MDF2	0.9527	0.902
	ITGB2	CD18 / LFA-1	8.1239	1.0E-4
	ITGB3	CD61 / GP3A,	2.6182	0.1115
	ITGB4	CD104	0.9887	0.9639
	ITGB5	FLJ26658	0.6541	0.4469
	ITGB6	Integrin, beta 6	2.2533	0.1426
	ITGB7	Integrin, beta 7	3.8266	2.0E-4
	ITGB8	Integrin, beta 8	0.5199	1.0E-4
	VTN	Vitronectin	3	0.267
	FN1	Fibronectin	1	0.3957
	SIGNALING / TRANSCRIPTION / REGULATION
	Phospholipase C
	PLCB1	Phosphoinositide phospholipase C-beta-1	0.7408	0.1257
	PLCB2	Phosphoinositide phospholipase C-beta-2	6.7213	7.0E-4
	PLCB3	Phosphoinositide phospholipase C-beta-3	1.5081	0.1624
	PLCB4	Phosphoinositide phospholipase C-beta-4	1.3392	0.6102
	PLCD1	Phospholipase C-delta-1	0.8392	0.6574
	PLCD3	Phospholipase C-delta-3	1.062	0.8476
	PLCD4	Phospholipase C-delta-4	1.4177	0.3577
	PLCE1	Phospholipase C, epsilon 1	1.4425	0.3066
	PLCG1	Phospholipase C-gamma-1	1.2885	0.4973
	PLCG2	Phospholipase C, gamma 2	3.326	2.0E-4
	PLCZ1	Phospholipase C-zeta-1	1.8207	0.1739
	Phosphatidylinositol-3-kinases
	PIK3C3	Phosphatidylinositol 3-kinase p100	1.8336	0.2531
	PIK3CA	PtdIns-3-kinase subunit p110-alpha	0.7025	0.4956
	PIK3CB	PtdIns-3-kinase subunit beta	1.3521	0.3604
	PIK3CD	PtdIns-3-kinase subunit p110-delta	4.9614	3.0E-4
	PIK3R1	PtdIns-3-kinase regulatory subunit alpha	0.7731	0.4386
	PIK3R2	PtdIns-3-kinase regulatory subunit beta	0.822	0.7221
	PIK3R3	PI3-kinase regulatory subunit gamma	1.9863	0.1496
	PIK3R4	PI3-kinase regulatory subunit 4	1.0714	0.7465
	PIK3R5	PI3-kinase regulatory subunit 5	8.3755	1.0E-4
	PIK3C2A	PtdIns-3-kinase C2 subunit alpha	1.5545	0.3242
	PIK3C2B	PtdIns-3-kinase C2 subunit beta	2.2078	0.013
	PIK3C2G	PtdIns-3-kinase C2 subunit gamma	0.335	0.1948
	Protein Kinase C
	PRKCA	Protein kinase C alpha type	2.2712	0.1416
	PRKCB	Protein kinase C, beta	3.5941	0.0048
	PRKCD	Protein kinase C delta type	2.0724	0.0273
	PRKCE	Protein kinase C, epsilon	1.045	0.8896
	PRKCZ	Protein kinase C, zeta	0.8927	0.7814
	Ras homolog (RHO) and Ras-related GTPases
	DIRAS3	DIRAS family, GTP-binding RAS-like 3	0	0.2993
	RHOA	Small GTP binding protein RhoA	1.0984	0.821
	RHOB	rho-related GTP-binding protein RhoB	0.9476	0.8352
	RHOC	Small GTP binding protein RhoC	0.8233	0.6919
	RHOD	rho-related GTP-binding protein RhoD	0.8125	0.6863
	RHOG	rho-related GTP-binding protein RhoG	2.2866	0.0238
	RHOH	GTP-binding protein TTF	20.3966	0.0011
	CDC42	Cell Division Cycle 42	3.8238	0.0022
	RND2	Rho family GTPase 2	2.9922	0.0193
	RND3	Rho family GTPase 3	1.7855	0.0082
	RAC1	rho family, small GTP binding protein Rac1	1.3937	0.293
	RAC2	p21-Rac2	8.9575	0.0
	RAC3	ras-related C3 botulinum toxin substrate 3	0.813	0.4619
